# Supplementary material for: Ozone-Based Advanced Oxidation Processes for Primidone Removal in Water using Simulated Solar Radiation and TiO2 or WO3 as Photocatalyst
Source: Molecules. 2019 May 3;24(9):1728. doi: 10.3390/molecules24091728 (PMC6539243; doi:10.3390/molecules24091728)
Supplement: Supplementary file 1 [file molecules-24-01728-s001.pdf]

## **Supplementary information**

### **Ozone based AOPs for primidone removal in water using simulated solar radiation and TiO<sub>2</sub> or WO<sub>3</sub> as photocatalyst**

Manuel Figueredo, Eva M. Rodríguez, Manuel Checa and

Fernando J. Beltrán\*

Departamento de Ingeniería Química y Química Física. Instituto Universitario de Investigación del Agua, Cambio Climático y Sostenibilidad. Universidad de Extremadura. 06006 Badajoz. Spain.

\*corresponding author email: [manuelfigueredo@unex.es](mailto:manuelfigueredo@unex.es)

### Absolute method for the determination of ozone-Primidone reaction rate constant

Experimental procedure: A mixture of primidone ( $C_{PRM,0} = 2.3 \times 10^{-5} \text{ M}$ ) and tert-butyl alcohol ( $C_{TBA,0} = 2.5 \times 10^{-3} \text{ M}$ ) in ultrapure water was ozonized ( $C_{O_3g,inlet} = 10 \text{ mg L}^{-1}$ ;  $Q_{O_2-O_3} = 20 \text{ L h}^{-1}$ ) at pH 2 and 20 °C, and the evolution with time of PRM and dissolved ozone concentrations analyzed. At these conditions, degradation of PRM takes place only through its direct reaction with molecular ozone.

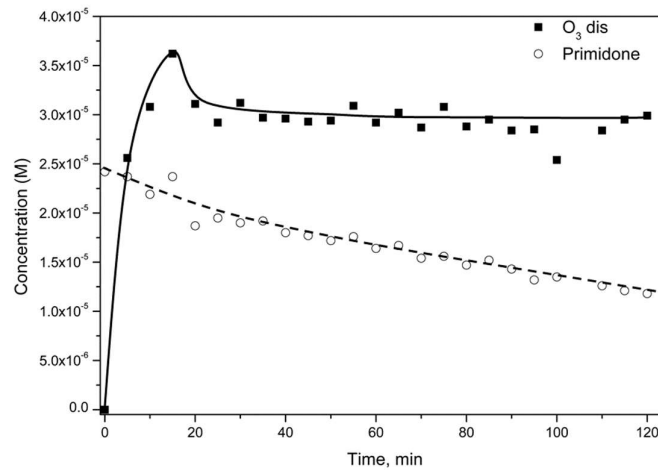

**Figure S1:** Evolution of PRM and dissolved O<sub>3</sub> concentrations with time during the ozonation of PRM in presence of TBA (two replicates). Experimental conditions:  $C_{PRM,0} = 2 \times 10^{-5} \text{ M}$ ;  $C_{TBA,0} = 2.3 \times 10^{-3} \text{ M}$ ; pH = 2; T = 20 °C;  $C_{O_3g,inlet} = 10 \text{ mg L}^{-1}$ ;  $Q_{O_2-O_3} = \text{L h}^{-1}$ .

Calculus: In the semibatch perfectly mixed reactor used in this work, at the conditions tested and assuming a second-order kinetics for the reaction between ozone and PRM, PRM mass balance can be expressed as follows:

$$-\frac{dC_{PRM}}{dt} = k_D C_{PRM} C_{O_3} \quad (S1)$$

As observed in Figure S1 dissolved ozone concentration in solution ( $C_{O_3}$ ) reached a stationary state ( $C_{O_3ss}$ ) after 25 minutes ( $t_{ss}$ ). Hence, for higher reaction times a pseudo first order kinetic model can be assumed:

$$-\frac{dC_{PRM}}{dt} = k'_D C_{PRM} \quad (S2)$$

where  $k'_D = k_D C_{O3ss}$ , being  $C_{O3ss} = 2.9 \times 10^{-5}$  M (see Fig S1).

The integration of equation (S2) leads to equation (S3):

$$\ln \frac{C_{PRMss}}{C_{PRM}} = k'_D (t - t_{ss}) \quad (S3)$$

where  $C_{PRMss}$  is the concentration of PRM at  $t_{ss}$ .

Thus,  $k'_D$  value can be obtained by fitting experimental data to eq. (S3) as shown in Figure S2. From least squares analysis of the straight line shown in this figure  $k'_D$  resulted to be  $9.02 \cdot 10^{-5} \text{ s}^{-1}$  ( $R^2=0.97$ ). Therefore, the second-order rate constant of the reaction between PRM and  $O_3$  is  $k_D = 3.08 \text{ M}^{-1}\text{s}^{-1}$ .

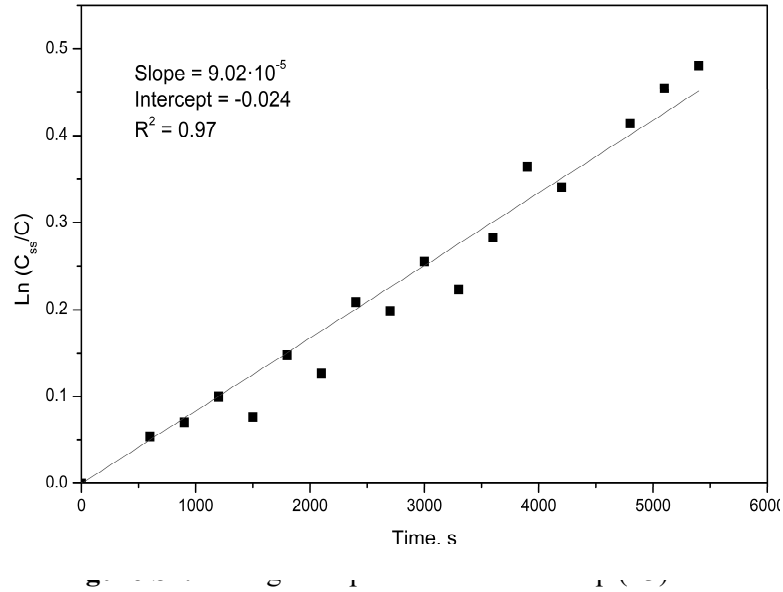

Once the rate constant was obtained the slow kinetic regime of ozone absorption was verified determining the Hatta number by equation S4 [1]). In eq. S4  $D_{O3}$  is the diffusivity of ozone in water ( $1.76 \times 10^{-9} \text{ m}^2 \text{ s}^{-1}$ ; [2]) and  $k_L$  the individual liquid-side mass transfer coefficient calculated as  $3.74 \times 10^{-4} \text{ m s}^{-1}$  from Calderbank's equation [3]. For slow kinetic

regime  $Ha$  is  $< 0.3$  [1].

$$Ha = \frac{\sqrt{k_D C_{PRM} D_{O_3}}}{k_L} \quad (S4)$$

According to S4 from the estimated  $k_D$  and the experimental  $C_{PRM}$  data,  $Ha$  resulted to be  $< 0.3$  which validates the value of  $k_D$  obtained.

### **Concentration of hydrogen peroxide during photocatalytic oxidation processes studied in this work**

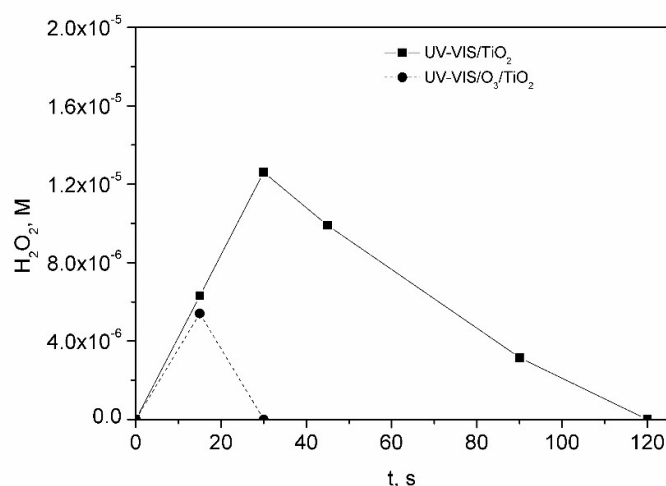

**Figure S3.** Changes of hydrogen peroxide concentration with time during PRM oxidation with UV-Vis/TiO<sub>2</sub> and UV-Vis/TiO<sub>2</sub>/O<sub>3</sub> systems. Experimental conditions: Ultrapure water;  $[PRM]_0 = 5 \text{ mg L}^{-1}$ ;  $pH_0 \sim 6$  (natural pH);  $[TiO_2] = 0.25 \text{ g L}^{-1}$ ;  $Q_{m,O_3} = 3.3 \text{ mg min}^{-1}$ ;  $T = 20\text{-}30 \text{ }^\circ\text{C}$ ;  $I_{UV-Vis} = 8.2 \times 10^{-5} \text{ Einstein L}^{-1} \text{ s}^{-1}$ .

### **References**

- [1] J.C. Charpentier, Mass-transfer rates in gas-liquid absorbers and reactors, Adv. Chem. Eng. 11 (1981) 1–133. doi:10.1016/S0065-2377(08)60025-3.
- [2] P.N. Johnson, R.A. Davis, Diffusivity of ozone in water, J. Chem. Eng. Data. 41 (1996) 1485–1487. doi:10.1021/jc9602125.
- [3] G.F. Froment, K.B. Bischoff, J. De Wilde, Chemical Reactor Analysis and Design, 3rd edition, John Wiley & Sons, Inc., USA, 2011.
